## 35 Introduction

36 *Clostridioides (Clostridium) difficile* is a major cause of antimicrobial-associated diarrhoea globally (1).  
37 *C. difficile* infection (CDI) is mediated by toxins and, so far, there have been three different major  
38 toxins identified: toxin A (TcdA), toxin B (TcdB) and binary toxin (*C. difficile* transferase, CDT). The  
39 genes encoding TcdA and TcdB are located on the 19.6 kb pathogenicity locus (PaLoc) (2) and the  
40 genes for CDT are located in a different part of the chromosome, the CDT locus (3). In non-toxigenic  
41 *C. difficile* (NTCD), the PaLoc is replaced by a fixed 115 bp locus (2). The toxin genes (*tcdA*, *tcdB*, *cdtA*  
42 and *cdtB*) can be detected by PCR (4, 5), however, some *C. difficile* strains, such as *C. difficile* ribotype  
43 (RT) 017, have a deletion at the repeating region of the *tcdA* gene, resulting in a truncated and non-  
44 functional toxin A (6). Several methods have been developed to detect this deletion (7, 8).

45 *C. difficile* can be separated into different RTs by amplifying the intergenic spacer region  
46 between the 16S and 23S rRNA genes (9). This classification method has been used worldwide due to  
47 its simplicity and high discriminating power (10). Important *C. difficile* RTs include *C. difficile* RT 027,  
48 an A+B+CDT+ strain associated with outbreaks of severe CDI in North America and Europe in the early  
49 2000s (11), *C. difficile* RT 078, another A+B+CDT+ strain associated with zoonotic disease (12), and  
50 *C. difficile* RT 017, a *tcdA*-negative (A-B+CDT-) strain associated with global outbreaks since 1995 (6).

51 Although resistance to antimicrobials used for the treatment of CDI is relatively rare (13),  
52 resistance to other commonly used antimicrobials plays an important role in the pathogenesis of CDI  
53 and the spread of *C. difficile*. Resistance to clindamycin, new generation fluoroquinolones, rifampicin  
54 and tetracycline has been associated with outbreaks of CDI (14), and these antimicrobials are also  
55 associated with an increased risk of developing CDI in general (15). Strict regulation of antimicrobials  
56 can be a successful measure to control CDI. In the US, such regulation resulted in a significant decrease  
57 in CDI cases and CDI-related deaths (16). Fluoroquinolone regulation in Australia is also associated  
58 with a relatively low prevalence of fluoroquinolone-resistant organisms (17), including *C. difficile* (18).

59 In previous studies, the epidemiology of CDI in Thailand has been characterised by a high  
60 prevalence of A-B+CDT- and NTCD, and an absence of A+B+CDT+ strains (19-21). *C. difficile* strains  
61 isolated in Thailand, especially *C. difficile* RT 017, were resistant to many antimicrobial groups,  
62 reflecting the use and misuse of these antimicrobials in the country (22). This study provides an update  
63 on the characterisation and antimicrobial susceptibility of *C. difficile* isolated from a tertiary hospital  
64 in Bangkok, Thailand.

65

## 66 Materials and Methods

### 67 Isolation and characterisation of *C. difficile*

68 The study included 326 diarrhoeal stools samples collected from patients being treated at Siriraj  
69 Hospital, a large teaching hospital in Bangkok, Thailand, during 2017 – 2018. All stool samples were  
70 screened for the presence of the *tcdB* gene using the BD Max Cdiff assay (Becton Dickinson, US) as a  
71 part of routine investigations at Siriraj Hospital, and stools that were *tcdB* positive were then sent to  
72 a reference laboratory in Perth, Western Australia, for further investigation.

73 At the reference laboratory, stool samples were processed as previously described, including  
74 enrichment culture in cooked meat broth supplemented with gentamicin, cefoxitin and cycloserine  
75 (23). Characterisation of *C. difficile* was performed by PCR ribotyping and toxin gene profiling.  
76 PCR ribotyping was performed using the method described by Stubbs *et al* (9). The banding patterns  
77 were compared to a local database consisting of more than 80 internationally recognised RTs,  
78 including 15 reference RTs from the European Centre for Disease Prevention and Control. Patterns  
79 that did not match strains in the database were given an internal nomenclature. Detection of *tcdA* and  
80 *tcdB*, and the binary toxin genes (*cdtA* and *cdtB*), was performed using the methods described by Kato

81 *et al* (7) and Stubbs *et al* (5), respectively. All NTCD isolates in this study were confirmed as such by  
82 the absence of the PaLoc using the method described by Braun *et al* (*lok* PCR) (2).

83 All stool samples were screened also for colonisation with multiple *C. difficile* strains. Briefly,  
84 DNA extraction was performed on all enrichment broths. DNA was then screened with either *tcdB* (7)  
85 or *lok* PCR (2), based on the toxin profile of the first *C. difficile* strain isolated from the specimen (2,  
86 7). For example, a specimen previously positive for toxigenic *C. difficile* (TCD) was screened with  
87 *lok* PCR for NTCD and vice versa. All screening-positive broths were re-cultured and the second  
88 *C. difficile* strain characterised as described above.

### 89 Antimicrobial susceptibility testing

90 Antimicrobial susceptibility testing (AST) was performed using the agar incorporation method as  
91 described by the Clinical and Laboratory Standards Institute (CLSI) against nine antimicrobials listed in  
92 **Table 1** (24). *C. difficile* ATCC 700057, *Bacteroides fragilis* ATCC 25285, *Eubacterium lentum* ATCC  
93 43055 and *B. thetaiotamicron* ATCC 29741 were included as control strains. Susceptibility results were  
94 interpreted using the minimal inhibitory concentration (MIC) breakpoints listed in **Table 1** (24-28).  
95 *C. difficile* strains that were resistant to at least three different antimicrobial classes were classified as  
96 multidrug-resistant (MDR). Resistance to clindamycin and erythromycin was considered as resistance  
97 to a single class (macrolide-lincosamide-streptogramin B; MLS<sub>B</sub>).

98 **Table 1** – List of antimicrobials, test ranges and susceptibility breakpoints used in this study.

| Antimicrobial           | Test range (mg/l) | Breakpoint (mg/l) |   |      | Reference |
|-------------------------|-------------------|-------------------|---|------|-----------|
|                         |                   | S                 | I | R    |           |
| Clindamycin             | 0.008 – 256       | ≤ 2               | 4 | ≥ 8  | (24)      |
| Erythromycin            | 0.06 – 256        | -                 | - | > 8  | (25)      |
| Moxifloxacin            | 0.06 – 64         | ≤ 2               | 4 | ≥ 8  | (24)      |
| Amoxicillin/clavulanate | 0.015 – 16        | ≤ 4               | 8 | ≥ 16 | (24)      |
| Meropenem               | 0.12 – 16         | ≤ 4               | 8 | ≥ 16 | (24)      |
| Rifaximin               | 0.008 – 64        | -                 | - | > 32 | (26)      |
| Metronidazole           | 0.008 – 4         | ≤ 2               | - | > 2  | (27)      |
| Vancomycin              | 0.03 – 4          | ≤ 2               | - | > 2  | (27)      |
| Fidaxomicin             | 0.002 – 2         | -                 | - | > 1  | (28)      |

99

### 100 Whole-genome sequencing, high-resolution typing and antimicrobial resistance characterisation

101 A subset of *C. difficile* strains (n = 37) was selected for whole-genome sequencing (WGS) to explore  
102 possible antimicrobial resistance (AMR) genotypes. Genomic DNA was extracted, sequenced on an  
103 Illumina HiSeq platform which generated 150 bp pair-end reads with a median coverage of 73X and  
104 characterised by multi-locus sequence typing (MLST) as previously described (29). Clade assignment  
105 of a newly defined sequence type (ST) was confirmed by comparing the average nucleotide identity  
106 (ANI) with *C. difficile* strains 630 (clade 1, GenBank accession AM180355) and R20291 (clade 2,  
107 GenBank accession FN545816) using FastANI (30). Known accessory AMR genes were identified by  
108 interrogating the read files with SRST2 version 0.2.0 against ARGannot database version 3 (31, 32).  
109 Draft annotated genomes were interrogated on Artemis version 17.0.1 to look for additional accessory  
110 genes (33). The genomes were interrogated also for the presence of known point substitutions  
111 associated with resistance to carbapenems (substitution in penicillin-binding proteins PBP1 and PBP3),  
112 fluoroquinolones (substitution in GyrA and GyrB subunit of the gyrase enzyme) and rifaximin  
113 (substitution in RpoB enzyme) (34, 35). The genotypes were then compared with phenotypic  
114 susceptibility data. All sequence data generated in this study have been submitted to the European  
115 Nucleotide Archive under BioProject PRJEB40974, sample accessions ERS5247348 – ERS5247384.  
116 Details of the genomes are available in the **Supplementary Table S1**.

## 117 Statistical analysis

118 All statistical analyses were performed using online tools by Social Science Statistics available at  
119 <https://www.socscistatistics.com/>. A p-value  $\leq 0.05$  was considered statistically significant.

## 120 Human research ethics approval

121 This study was approved by the Human Research Ethics Committee of The University of Western  
122 Australia (reference file RA/4/20/4704) and the Siriraj Institutional Review Board (protocol number  
123 061/2558 [EC1]).

124

## 125 **Results**

### 126 Characterisation of Thai *C. difficile*

127 A total of 296 *C. difficile* strains were initially isolated from the stool samples. Forty-four of the original  
128 326 PCR positive stool samples were negative for TCD by culture; 30 contained no *C. difficile* while  
129 from 14 only NTCD was cultured. The enrichment broths for these samples were re-screened for TCD  
130 and were all negative by *tcdB* PCR. Another 25 strains were identified from the co-colonisation  
131 screening process, yielding a total of 321 *C. difficile* strains. Of these, 221 (68.85%) were positive for  
132 *tcdA* and *tcdB* (A+B+CDT-), 58 (18.07%) were positive for *tcdB* only and had a deletion in *tcdA* (A-  
133 B+CDT-), three (0.93%) were positive for *tcdA*, *tcdB*, as well as *cdtA* and *cdtB* (A+B+CDT+) and 39 strains  
134 (12.15%) were negative for all toxin genes (A-B-CDT-, NTCD).

135 The 321 *C. difficile* strains belonged to 63 different RTs, 19 of which were internationally  
136 recognised. The remaining RTs were given internal nomenclature beginning with either "QX" or "KI".  
137 The prevalence of the most common RTs is summarised in **Table 2**. The most common TCD strain was  
138 *C. difficile* RT 017 (A-B+CDT-), followed by RTs 014 and 020 (both A+B+CDT-). The most common NTCD  
139 was *C. difficile* RT 010.

### 140 Characterisation of a novel binary toxin-positive *C. difficile* isolate

141 One of the *C. difficile* strains isolated in this study was positive for all three toxin genes (A+B+CDT+)  
142 and had a unique ribotyping pattern compared to the local reference library. According to the MLST  
143 scheme, this isolate was characterised as the novel ST 692 within evolutionary clade 1. However,  
144 pairwise ANI analysis showed that this strain was more closely related to *C. difficile* R20291 (clade 2,  
145 ANI = 99.17%) than *C. difficile* 630 (clade 1, ANI = 98.89%).

### 146 Antimicrobial susceptibility of Thai *C. difficile*

147 Overall antimicrobial susceptibility results are shown in **Table 3** and the MIC distribution of selected  
148 six antimicrobial classes is displayed in **Figure 1**. Based on the MIC value, clindamycin-resistant  
149 *C. difficile* strains could be divided into two groups: those with MIC  $\geq 32$  mg/l (n = 97) and those with  
150 MIC < 32 mg/l (n = 166). There was a strong correlation between high-level clindamycin resistance and  
151 erythromycin resistance: 95 strains (97.94%) that had clindamycin MIC  $\geq 32$  mg/l were also resistant  
152 to erythromycin while only 16 strains (9.64%) in the other group were resistant to erythromycin  
153 (Cohen's kappa = 0.857). There was also a clear separation in MIC value between strains with and  
154 without rifaximin resistance. The separation was less clear for moxifloxacin and was not observed in  
155 amoxicillin/clavulanate and meropenem.

156 **Table 2** – Ribotypes of 321 *C. difficile* strains from Thailand, by toxin profile.

| Toxin Profile   | Ribotype     | Number     | % of toxigenic strains | % of all   |
|-----------------|--------------|------------|------------------------|------------|
| <b>A+B+CDT-</b> | <b>Total</b> | <b>221</b> | <b>78%</b>             | <b>69%</b> |
|                 | 014          | 40         | 14%                    | 12%        |
|                 | 020          | 24         | 9%                     | 7%         |
|                 | 046          | 18         | 6%                     | 6%         |
|                 | QX517        | 17         | 6%                     | 5%         |
|                 | 297          | 13         | 5%                     | 4%         |
|                 | QX026        | 11         | 4%                     | 3%         |
|                 | 043          | 10         | 4%                     | 3%         |
|                 | Others       | 88         | 31%                    | 27%        |
| <b>A-B+CDT-</b> | <b>Total</b> | <b>58</b>  | <b>21%</b>             | <b>18%</b> |
|                 | 017          | 58         | 21%                    | 18%        |
| <b>A+B+CDT+</b> | <b>Total</b> | <b>3</b>   | <b>1%</b>              | <b>1%</b>  |
|                 | 078          | 1          | <1%                    | <1%        |
|                 | QX273        | 1          | <1%                    | <1%        |
|                 | KI008        | 1          | <1%                    | <1%        |
| <b>A-B-CDT-</b> | <b>Total</b> | <b>39</b>  | -                      | <b>12%</b> |
|                 | 010          | 7          | -                      | 2%         |
|                 | QX002        | 5          | -                      | 2%         |
|                 | 009          | 4          | -                      | 1%         |
|                 | QX011        | 4          | -                      | 1%         |
|                 | Others       | 19         | -                      | 6%         |

157 Note: RTs designated with "QX" and "KI" were RTs that did not match the internationally recognised  
 158 RTs in the database and were given internal nomenclature.

159

160 **Table 3** – Antimicrobial susceptibility of 321 *C. difficile* strains from Thailand.

| Antimicrobial           | MIC range (mg/l) | MIC <sub>50</sub> (mg/l) | MIC <sub>90</sub> (mg/l) | Susceptibility (%) |          |           |
|-------------------------|------------------|--------------------------|--------------------------|--------------------|----------|-----------|
|                         |                  |                          |                          | S                  | I        | R         |
| Clindamycin             | 0.5 – >256       | 8                        | >256                     | 26 (8%)            | 32 (10%) | 263 (82%) |
| Erythromycin            | 0.5 – >256       | 2                        | >256                     | -                  | -        | 109 (34%) |
| Moxifloxacin            | 0.5 – >64        | 2                        | 32                       | 242 (75%)          | 3 (1%)   | 76 (24%)  |
| Amoxicillin/clavulanate | 0.25 – 8         | 0.5                      | 1                        | 320 (>99%)         | 1 (<1%)  | 0         |
| Meropenem               | 1 – 16           | 4                        | 8                        | 280 (87%)          | 39 (12%) | 2 (1%)    |
| Rifaximin               | ≤0.008 – >64     | 0.03                     | 2                        | -                  | -        | 31 (10%)  |
| Metronidazole           | 0.06 – 1         | 0.25                     | 0.25                     | 321 (100%)         | -        | 0         |
| Vancomycin              | 0.5 – 2          | 1                        | 2                        | 321 (100%)         | -        | 0         |
| Fidaxomicin             | 0.03 – 0.25      | 0.125                    | 0.25                     | -                  | -        | 0         |

161

162 When classified by toxin gene profiles, resistance to clindamycin, erythromycin, moxifloxacin  
163 and rifaximin were more prevalent among A-B+CDT- *C. difficile*, all of which belonged to RT 017, than  
164 A+B+CDT- and NTCD (Figure 1). A total of 29 (9.03%) *C. difficile* isolates were MDR, 26 (8.10%) of which  
165 were *C. difficile* RT 017 (A-B+CDT-). The remaining isolates were NTCD (n=2) and A+B+CDT- *C. difficile*  
166 (n=1). All MDR isolates were resistant to the MLS<sub>B</sub> group (both clindamycin and erythromycin),  
167 moxifloxacin and rifaximin. One MDR isolate was also resistant to meropenem (A-B+CDI-, RT 017, MIC  
168 = 16 mg/l).

169

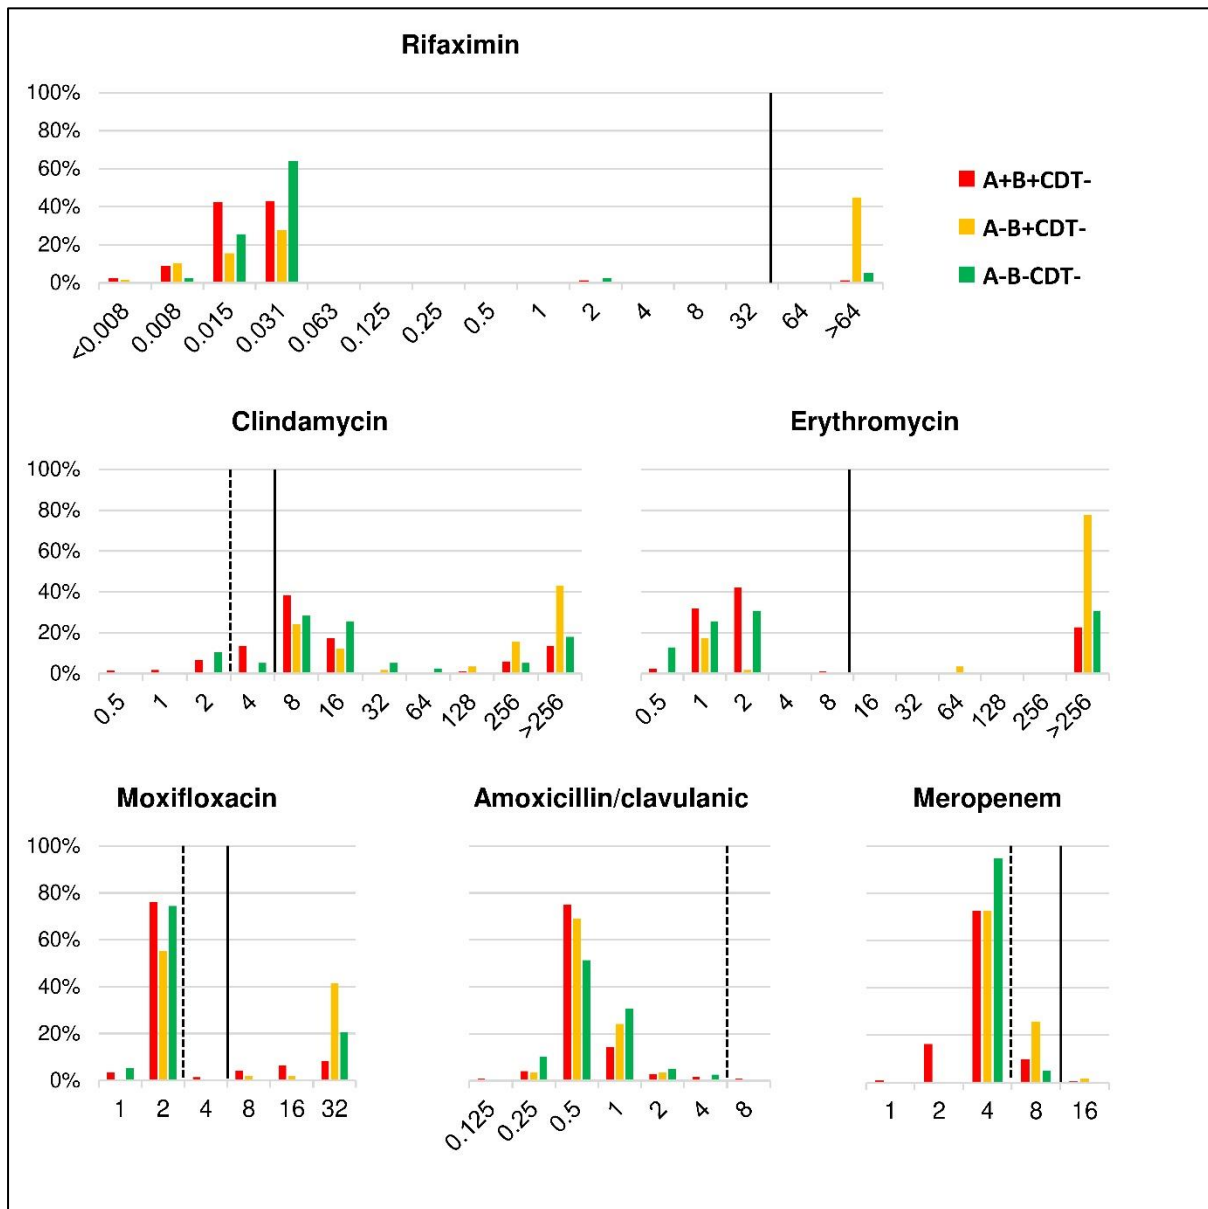

170

171 **Figure 1 – MIC distribution for six antimicrobials against 321 strains of *C. difficile* in Thailand.**  
172 *C. difficile* strains were classified according to their toxin gene profiles: A+B+CDT-, red; A-B+CDT-,  
173 yellow; A-B-CDT-, green. The number of A+B+CDT+ *C. difficile* strains was low (n = 3) and these were  
174 excluded. Breakpoints for intermediate resistance (I) and resistance (R) are shown by broken and solid  
175 lines, respectively.

## 176 Genotypic resistance determinants in Thai *C. difficile*

177 A summary of MIC values and genotypic resistance determinants of 37 sequenced *C. difficile* strains is  
178 available in **Supplementary Table S2**. Of these strains, 31 had high-level resistance to clindamycin: 23  
179 strains carried an *erm(B)* gene, five carried an *erm(G)* gene and three carried a gene encoding an rRNA  
180 adenine N(6)-methyltransferase family protein [GenBank accession WP\_002571018.1], the closest  
181 match to which in the CARD database was the Erm(42) protein [39% identity, E-value = 1.19E-53] (36).  
182 Of the 23 *erm(B)*-positive strains, 19 carried the *erm(B)* gene on transposon Tn6194 (82.61%), while  
183 the other four (17.39%) carried the gene on Tn6189. No *erm*-class genes were identified among strains  
184 with low-level clindamycin resistance. The concordance between the presence of *erm*-class gene and  
185 high-level clindamycin resistance was 91.89%. The concordance increased to 100% when the  
186 uncharacterised *erm*-class gene was included. A gene encoding a macrolide efflux protein [accession  
187 WP\_009271522.1] was identified in two strains with high-level erythromycin resistance (MIC > 256  
188 mg/l). No significant genotypic resistance determinants were identified in strains with low-level  
189 clindamycin resistance.

190 A T82I substitution in GyrA was found in 23 strains and a D426V substitution in GyrB was found  
191 in one strain with a moxifloxacin MIC of 16 – 32 mg/l. No known point substitutions were found in the  
192 remaining 14 strains, 13 of which were moxifloxacin-susceptible; one had low-level moxifloxacin  
193 resistance (MIC 8 mg/l) [97.37% concordance]. H502N and R505K substitutions in RpoB were found in  
194 all 23 rifaximin-resistant strains and none of the susceptible strains [100% concordance].

195 Twelve strains had an A555T substitution in penicillin-binding protein 1 (PBP1) and another  
196 seven had a Y721S substitution in PBP3. A multiple linear regression analysis was performed to assess  
197 the association between the presence of these substitutions and the MIC values for meropenem. The  
198 Y721S substitution on the PBP3 was associated with an increase in meropenem MIC (adjusted  $R^2 =$   
199 0.516,  $t = 5.521$ ,  $p < 0.0001$ ), while the A555T substitution on the PBP1 was not associated with the  
200 change in meropenem MIC ( $t = -1.127$ ,  $p = 0.268$ ).

201

## 202 **Discussion**

203 This study provides an update on the molecular epidemiology and antimicrobial susceptibility of  
204 *C. difficile* strains circulating in Thailand. It also explores the genomic basis of important AMR in these  
205 strains. As the focus was on patients suspected of having CDI and not on the prevalence of *C. difficile*  
206 in the general population, the stool samples included in this study were first screened for the *tcdB*  
207 gene by PCR before culture. Thus the overall prevalence of TCD was higher than previous studies in  
208 Thailand (19-21), however, the common strains found were similar. The majority of A+B+CDT- strains  
209 belonged to *C. difficile* RT 014/020 group, all A-B+CDT- strains belonged to *C. difficile* RT 017 and most  
210 NTCD belonged to *C. difficile* RTs 009, 010 and 039. Three binary toxin-positive isolates were found in  
211 this study, one of which was *C. difficile* RT 078. The epidemic *C. difficile* RT 027 remained absent in  
212 Thailand despite its successful spread in other regions (37).

213 Why *C. difficile* RT 027 has failed to spread and to establish in Thailand, and Southeast Asia in  
214 general, remains unknown. One possible reason is that the successful spread of this RT was mainly  
215 due to its resistance to fluoroquinolones which provided an advantage over other less resistant RTs  
216 (38). Although there is high consumption of fluoroquinolones, such as levofloxacin, in the country (39),  
217 Thailand already harbours *C. difficile* RT 017, another epidemic RT with a high prevalence of resistance  
218 to fluoroquinolones, as well as other antimicrobials (14). Thus, it may have been difficult for *C. difficile*  
219 RT 027 to compete with this local RT compared to other regions.

220 Though *C. difficile* RT 027 was not identified in this study, a possible relative of this  
221 hypervirulent strain was identified (ST 692). The MLST result for this strain was unusual, as it was  
222 classified into clade 1 despite containing binary toxin genes in a complete CDT locus. The presence of

223 binary toxin genes is a feature common in *C. difficile* clades 2 and 5 but rare in clade 1 (40). Thus, an  
224 ANI analysis was performed, which indicated that this newly characterised strain was more related to  
225 clade 2 than clade 1 *C. difficile*, as expected from the toxin gene profile. Clades 1 and 2 *C. difficile* are  
226 closely related and share a large proportion of housekeeping gene alleles used in the MLST scheme.  
227 As a result, it may be difficult to properly discriminate these two clades by this method. The use of ANI  
228 analysis, which involves the whole genome rather than a specific set of housekeeping genes, can help  
229 in the correct classification of some borderline strains as shown in a previous study (40). According to  
230 the ANI analysis, it is likely that this newly described *C. difficile* ST 692 belongs to clade 2 and is related  
231 to *C. difficile* RT 027.

232 A discordance between culture results and the result of a conventional real-time *tcdB* PCR was  
233 observed in 44 stool samples. The false-positive rate of the real-time PCR method (13.50%) was  
234 comparable to the previous report comparing *tcdB* PCR with a similar enrichment culture method but  
235 without the colonisation screening step (23). This suggests that the additional screening step does not  
236 significantly increase the yield of the culture method, although it may help identify stool samples with  
237 multiple *C. difficile* strains. This false-positive rate also highlights the importance of patient clinical  
238 data or additional tests to improve the accuracy of CDI diagnosis. In the latest guidelines for the  
239 treatment and diagnosis of CDI, *tcdB* PCR is no longer recommended as a stand-alone test unless the  
240 patient has symptoms suggestive of CDI (41).

241 AMR in *C. difficile* affects both the pathogenesis and treatment of CDI. To cause the disease,  
242 *C. difficile* must tolerate the presence of antimicrobials in the intestinal lumen while the microbiota  
243 perishes (14). Many successful *C. difficile* lineages have indeed been characterised with increased  
244 resistance to at least one major drug group (14). In this study, *C. difficile* RT 017, which was the most  
245 common RT, had greater resistance to MLS<sub>B</sub> (both clindamycin and erythromycin), moxifloxacin and  
246 rifaximin than other RTs. It was also the most common MDR *C. difficile* strain in this study. *C. difficile*  
247 RT 017 has been reported also to be the most prevalent RT with significant resistance to many  
248 antimicrobials in other parts of Thailand (21). This particular RT has been associated with resistance  
249 to at least six antimicrobial groups (14), which may have accounted for its successful global spread (6).  
250 As regulation of antimicrobial use has reduced the impact of *C. difficile* in many countries (16, 18), a  
251 similar approach should be effective for the control of CDI in Thailand.

252 All *erm(B)*-positive *C. difficile* strains carried the gene on two well-characterised *erm(B)*-  
253 positive transposons: Tn6189 and Tn6194, the latter being found also in *C. difficile* M68, a *C. difficile*  
254 RT 017 strain widely used as a reference in genomic studies (14). Tn6194, the most prevalent  
255 transposon in this study, is capable of inter-species transfer, most notably between *C. difficile* and  
256 *Enterococcus faecalis* (42). This emphasises another aspect of AMR in *C. difficile*; its possible role as a  
257 reservoir of AMR genes for other pathogenic bacteria residing in the colon.

258 Previously, it has been reported that concordance between the presence of the *erm(B)* gene  
259 and the MLS<sub>B</sub> resistance phenotype was low (43). This is likely due to the presence of multiple  
260 resistance mechanisms. In a previous study, however, the *erm(B)* gene was found in all *C. difficile*  
261 isolates with high-level resistance to both clindamycin and erythromycin, hinting that the gene may  
262 be associated with high-level MLS<sub>B</sub> resistance (44). We also observed separation between *C. difficile*  
263 strains with high-level and low-level clindamycin and erythromycin resistance (**Figure 1**). Upon  
264 genomic analysis of a subset of strains, we found a correlation between the presence of an *erm*-class  
265 gene (*erm(B)*, *erm(G)* and another possible *erm*-class gene) with high-level resistance to clindamycin.  
266 Many of these strains also had high-level erythromycin resistance, supporting the previous study (44).  
267 A gene encoding a macrolide efflux protein was identified also in strains with high-level erythromycin  
268 resistance and not in erythromycin-susceptible strains, suggesting an association between the  
269 presence of this efflux protein and phenotypic erythromycin resistance, although the function of this  
270 gene was not characterised. Resistance determinants were not identified among strains with low-level  
271 clindamycin resistance, however, this underestimation is likely irrelevant, as the median clindamycin



272 MIC in this population (8 mg/l) remained significantly lower than the clindamycin level in stools  
273 (approximately 240 mg/g of stool) (45). Besides MLS<sub>B</sub>, a separation between strains resistant and  
274 susceptible to rifaximin and fluoroquinolones was observed (**Figure 1**). The concordance between  
275 resistant phenotype and known genotype was also high, similar to a previous study (43).

276 Compared to the study at the same hospital in 2015, there was no difference in the overall  
277 resistance prevalence (25), however, there was a slight increase in meropenem MICs and the  
278 emergence of carbapenem resistance. In a previous study, high-level imipenem resistance was  
279 associated with point substitutions on PBP1 and PBP3 (35). It appears that these substitutions only  
280 confer high-level resistance to imipenem and not to meropenem, although the linear regression  
281 analysis suggests that the Y721S substitution on PBP3 may have contributed to a slight increase in  
282 meropenem MIC in this study.

283 *C. difficile* remained susceptible to metronidazole, vancomycin and fidaxomicin, similar to the  
284 other parts of the world (46). Thus, these antimicrobials should remain an effective treatment for CDI.  
285 There was a slight increase in vancomycin MIC reaching the clinical breakpoint, which is consistent  
286 with a previous study (25), however, this should have little impact on the treatment of CDI given that  
287 the faecal vancomycin concentration remains far greater than the MIC (>2,000 mg/l vs 2 mg/l) (47).  
288 The increase in vancomycin MIC in this study is in contrast to other hospitals in Thailand and this could  
289 reflect the usage of vancomycin at the study site (21). The use of vancomycin can lead to the  
290 emergence of vancomycin-resistant *Enterococcus* spp., which can have a devastating effect on  
291 patients (48, 49). Therefore, the use of vancomycin should be carefully monitored.

## 292 **Conclusion**

293 A-B+CDT- and NTCB were prevalent in Thailand. Few binary toxin-positive strains (A+B+CDT+) were  
294 identified; one belonged to a known epidemic lineage and another was a novel strain related to  
295 *C. difficile* RT 027. The most common RT in this study was *C. difficile* RT 017 (A-B+CDT-), a large  
296 proportion of which was resistant to MLS<sub>B</sub>, moxifloxacin and rifaximin. Many strains were also MDR.  
297 Such resistance may have played a role in the success of *C. difficile* RT 017 in Thailand. There was a  
298 strong concordance between the presence of *erm*-class genes and high-level clindamycin resistance,  
299 as well as significant concordance between point substitutions on gyrase subunits and RpoB protein  
300 with fluoroquinolone and rifaximin resistance, respectively. Resistance to antimicrobials for treatment  
301 of CDI was not detected.

## 302 **Acknowledgement**

303 Parts of this study were performed using the facilities provided by the Pawsey Supercomputing Centre  
304 (Perth, Western Australia).

## 305 **Funding**

306 This work was supported by Mahidol University (Mahidol Scholarship to K.I.) and the National Health  
307 and Medical Research Council of Australia (Peter Doherty Biomedical Early Career Fellowship  
308 [APP1138257] to D.R.K).

## 309 **Transparency declaration**

310 T.V.R. has received grants from Cepheid; Merck; Otsuka; Roche; Sanofi and Summit for work outside  
311 that in this report. Other authors have no conflicts of interest to declare.

## 312 References

- 313 1. Leffler DA, Lamont JT. *Clostridium difficile* Infection. N Engl J Med. 2015;373(3):287-8.
- 314 2. Braun V, Hundsberger T, Leukel P, Sauerborn M, von Eichel-Streiber C. Definition of the  
315 single integration site of the pathogenicity locus in *Clostridium difficile*. Gene. 1996;181(1-2):29-38.
- 316 3. Perelle S, Gibert M, Bourlioux P, Corthier G, Popoff MR. Production of a complete binary  
317 toxin (actin-specific ADP-ribosyltransferase) by *Clostridium difficile* CD196. Infect Immun.  
318 1997;65(4):1402-7.
- 319 4. Kato N, Ou CY, Kato H, Bartley SL, Brown VK, Dowell VR, Jr., et al. Identification of toxigenic  
320 *Clostridium difficile* by the polymerase chain reaction. J Clin Microbiol. 1991;29(1):33-7.
- 321 5. Stubbs S, Rupnik M, Gibert M, Brazier J, Duerden B, Popoff M. Production of actin-specific  
322 ADP-ribosyltransferase (binary toxin) by strains of *Clostridium difficile*. FEMS Microbiol Lett.  
323 2000;186(2):307-12.
- 324 6. Imwattana K, Knight DR, Kullin B, Collins DA, Putsathit P, Kiratisin P, et al. *Clostridium difficile*  
325 ribotype 017 - characterization, evolution and epidemiology of the dominant strain in Asia. Emerg  
326 Microbes Infect. 2019;8(1):796-807.
- 327 7. Kato H, Kato N, Watanabe K, Iwai N, Nakamura H, Yamamoto T, et al. Identification of toxin  
328 A-negative, toxin B-positive *Clostridium difficile* by PCR. J Clin Microbiol. 1998;36(8):2178-82.
- 329 8. Lemeé L, Dhalluin A, Testelin S, Mattrat M-A, Maillard K, Lemeland J-F, et al. Multiplex PCR  
330 targeting *tpi* (triose phosphate isomerase), *tcdA* (Toxin A), and *tcdB* (Toxin B) genes for toxigenic  
331 culture of *Clostridium difficile*. J Clin Microbiol. 2004;42(12):5710-4.
- 332 9. Stubbs SL, Brazier JS, O'Neill GL, Duerden BI. PCR targeted to the 16S-23S rRNA gene  
333 intergenic spacer region of *Clostridium difficile* and construction of a library consisting of 116  
334 different PCR ribotypes. J Clin Microbiol. 1999;37(2):461-3.
- 335 10. Elliott B, Androga GO, Knight DR, Riley TV. *Clostridium difficile* infection: Evolution,  
336 phylogeny and molecular epidemiology. Infect Genet Evol. 2017;49:1-11.
- 337 11. Warny M, Pepin J, Fang A, Killgore G, Thompson A, Brazier J, et al. Toxin production by an  
338 emerging strain of *Clostridium difficile* associated with outbreaks of severe disease in North America  
339 and Europe. Lancet. 2005;366(9491):1079-84.
- 340 12. Bakker D, Corver J, Harmanus C, Goorhuis A, Keessen EC, Fawley WN, et al. Relatedness of  
341 human and animal *Clostridium difficile* PCR ribotype 078 isolates determined on the basis of  
342 multilocus variable-number tandem-repeat analysis and tetracycline resistance. J Clin Microbiol.  
343 2010;48(10):3744-9.
- 344 13. Banawas SS. *Clostridium difficile* infections: a global overview of drug sensitivity and  
345 resistance mechanisms. Biomed Res Int. 2018;2018:8414257.
- 346 14. Imwattana K, Knight DR, Kullin B, Collins DA, Putsathit P, Kiratisin P, et al. Antimicrobial  
347 resistance in *Clostridium difficile* ribotype 017. Expert Rev Anti Infect Ther. 2020;18(1):17-25.
- 348 15. Slimings C, Riley TV. Antibiotics and hospital-acquired *Clostridium difficile* infection: update  
349 of systematic review and meta-analysis. J Antimicrob Chemother. 2014;69(4):881-91.
- 350 16. Centers for Disease Control and Prevention (CDC). Antibiotic resistance threats in the United  
351 States, 2019. Atlanta, GA: U.S. Department of Health and Human Services, CDC; 2019.
- 352 17. Cheng AC, Turnidge J, Collignon P, Looke D, Barton M, Gottlieb T. Control of fluoroquinolone  
353 resistance through successful regulation, Australia. Emerg Infect Dis. 2012;18(9):1453-60.
- 354 18. Lew T, Putsathit P, Sohn KM, Wu Y, Ouchi K, Ishii Y, et al. Antimicrobial susceptibilities of  
355 *Clostridium difficile* isolates from 12 Asia-Pacific countries in 2014 and 2015. Antimicrob Agents  
356 Chemother. 2020;64(7).
- 357 19. Putsathit P, Maneerattanaporn M, Piewngam P, Kiratisin P, Riley TV. Prevalence and  
358 molecular epidemiology of *Clostridium difficile* infection in Thailand. New Microbes New Infect.  
359 2017;15:27-32.
- 360 20. Ngamskulrunroj P, Sanmee S, Putsathit P, Piewngam P, Elliott B, Riley TV, et al. Molecular  
361 epidemiology of *Clostridium difficile* infection in a large teaching hospital in Thailand. PLoS One.  
362 2015;10(5):e0127026.

- 363 21. Imwattana K, Wangroongsarb P, Riley TV. High prevalence and diversity of *tcdA*-negative and  
364 *tcdB*-positive, and non-toxigenic, *Clostridium difficile* in Thailand. *Anaerobe*. 2019;57:4-10.
- 365 22. Zellweger RM, Carrique-Mas J, Limmathurotsakul D, Day NPJ, Thwaites GE, Baker S, et al. A  
366 current perspective on antimicrobial resistance in Southeast Asia. *J Antimicrob Chemother*.  
367 2017;72(11):2963-72.
- 368 23. Putsathit P, Morgan J, Bradford D, Engelhardt N, Riley TV. Evaluation of the BD Max Cdiff  
369 assay for the detection of toxigenic *Clostridium difficile* in human stool specimens. *Pathology*.  
370 2015;47(2):165-8.
- 371 24. Clinical and Laboratory Standards Institute (CLSI). *Methods for Antimicrobial Susceptibility*  
372 *Testing of Anaerobic Bacteria, Approved Standard M11-A8*. 8th ed. Wayne, PA: Clinical and  
373 Laboratory Standards Institute; 2012.
- 374 25. Putsathit P, Maneerattanaporn M, Piewngam P, Knight DR, Kiratisin P, Riley TV.  
375 Antimicrobial susceptibility of *Clostridium difficile* isolated in Thailand. *Antimicrob Resist Infect*  
376 *Control*. 2017;6:58.
- 377 26. O'Connor JR, Galang MA, Sambol SP, Hecht DW, Vedantam G, Gerding DN, et al. Rifampin  
378 and rifaximin resistance in clinical isolates of *Clostridium difficile*. *Antimicrob Agents Chemother*.  
379 2008;52(8):2813-7.
- 380 27. European Committee on Antimicrobial Susceptibility Testing. *Clinical breakpoint tables*,  
381 *version 8.1* London, United Kingdom [updated 16 May 2018. Available from:  
382 [http://www.eucast.org/clinical\\_breakpoints/](http://www.eucast.org/clinical_breakpoints/).
- 383 28. Goldstein EJC, Babakhani F, Citron DM. Antimicrobial activities of fidaxomicin. *Clin Infect Dis*.  
384 2012;55 Suppl 2:S143-8.
- 385 29. Knight DR, Squire MM, Collins DA, Riley TV. Genome analysis of *Clostridium difficile* PCR  
386 ribotype 014 lineage in Australian pigs and humans reveals a diverse genetic repertoire and  
387 signatures of long-range interspecies transmission. *Front Microbiol*. 2016;7:2138.
- 388 30. Jain C, Rodriguez-R LM, Phillippy AM, Konstantinidis KT, Aluru S. High throughput ANI  
389 analysis of 90K prokaryotic genomes reveals clear species boundaries. *Nature Communications*.  
390 2018;9.
- 391 31. Inouye M, Dashnow H, Raven LA, Schultz MB, Pope BJ, Tomita T, et al. SRST2: Rapid genomic  
392 surveillance for public health and hospital microbiology labs. *Genome Med*. 2014;6(11):90.
- 393 32. Gupta SK, Padmanabhan BR, Diene SM, Lopez-Rojas R, Kempf M, Landraud L, et al. ARG-  
394 ANNOT, a new bioinformatic tool to discover antibiotic resistance genes in bacterial genomes.  
395 *Antimicrob Agents Chemother*. 2014;58(1):212-20.
- 396 33. Carver T, Harris SR, Berriman M, Parkhill J, McQuillan JA. Artemis: an integrated platform for  
397 visualization and analysis of high-throughput sequence-based experimental data. *Bioinformatics*.  
398 2012;28(4):464-9.
- 399 34. Spigaglia P. Recent advances in the understanding of antibiotic resistance in *Clostridium*  
400 *difficile* infection. *Ther Adv Infect Dis*. 2016;3(1):23-42.
- 401 35. Isidro J, Santos A, Nunes A, Borges V, Silva C, Vieira L, et al. Imipenem resistance in  
402 *Clostridium difficile* ribotype 017, Portugal. *Emerg Infect Dis*. 2018;24(4):741-5.
- 403 36. Alcock BP, Raphenya AR, Lau TTY, Tsang KK, Bouchard M, Edalatmand A, et al. CARD 2020:  
404 antibiotic resistome surveillance with the comprehensive antibiotic resistance database. *Nucleic*  
405 *Acids Res*. 2020;48(D1):D517-D25.
- 406 37. Valiente E, Cairns MD, Wren BW. The *Clostridium difficile* PCR ribotype 027 lineage: a  
407 pathogen on the move. *Clin Microbiol Infect*. 2014;20(5):396-404.
- 408 38. He M, Miyajima F, Roberts P, Ellison L, Pickard DJ, Martin MJ, et al. Emergence and global  
409 spread of epidemic healthcare-associated *Clostridium difficile*. *Nat Genet*. 2013;45(1):109-13.
- 410 39. Prakobsrikul N, Malathum K, Santanirand P, Chumnumwat S, Piebpien P, Montakantikul P.  
411 Correlation between antimicrobial consumption and the prevalence of carbapenem-resistant  
412 *Escherichia coli* and carbapenem-resistant *Klebsiella pneumoniae* at a university hospital in Thailand.  
413 *J Clin Pharm Ther*. 2019;44(2):292-9.

- 414 40. Knight DR, Imwattana K, Kullin B, Guerrero-Araya E, Paredes-Sabja D, Didelot X, et al. The  
415 *Clostridioides difficile* species problem: global phylogenomic analysis uncovers three ancient,  
416 toxigenic, genomospecies. *BioRxiv*. 2020.
- 417 41. McDonald LC, Gerding DN, Johnson S, Bakken JS, Carroll KC, Coffin SE, et al. Clinical practice  
418 guidelines for *Clostridium difficile* infection in adults and children: 2017 update by the Infectious  
419 Diseases Society of America (IDSA) and Society for Healthcare Epidemiology of America (SHEA). *Clin*  
420 *Infect Dis*. 2018;66(7):987-94.
- 421 42. Wasels F, Monot M, Spigaglia P, Barbanti F, Ma L, Bouchier C, et al. Inter- and intraspecies  
422 transfer of a *Clostridium difficile* conjugative transposon conferring resistance to MLS<sub>B</sub>. *Microb Drug*  
423 *Resist*. 2014;20(6):555-60.
- 424 43. Knight DR, Kullin B, Androga GO, Barbut F, Eckert C, Johnson S, et al. Evolutionary and  
425 genomic insights into *Clostridioides difficile* sequence type 11: a diverse zoonotic and antimicrobial-  
426 resistant lineage of global one health importance. *mBio*. 2019;10(2).
- 427 44. Solomon K, Fanning S, McDermott S, Murray S, Scott L, Martin A, et al. PCR ribotype  
428 prevalence and molecular basis of macrolide-lincosamide-streptogramin B (MLS<sub>B</sub>) and  
429 fluoroquinolone resistance in Irish clinical *Clostridium difficile* isolates. *J Antimicrob Chemother*.  
430 2011;66(9):1976-82.
- 431 45. Kager L, Liljeqvist L, Malmborg AS, Nord CE. Effect of clindamycin prophylaxis on the colonic  
432 microflora in patients undergoing colorectal surgery. *Antimicrob Agents Chemother*. 1981;20(6):736-  
433 40.
- 434 46. Freeman J, Vernon J, Pilling S, Morris K, Nicholson S, Shearman S, et al. The ClosER study:  
435 results from a three-year pan-European longitudinal surveillance of antibiotic resistance among  
436 prevalent *Clostridium difficile* ribotypes, 2011-2014. *Clin Microbiol Infect*. 2018;24(7):724-31.
- 437 47. Gonzales M, Pepin J, Frost EH, Carrier JC, Sirard S, Fortier LC, et al. Faecal pharmacokinetics  
438 of orally administered vancomycin in patients with suspected *Clostridium difficile* infection. *BMC*  
439 *Infect Dis*. 2010;10:363.
- 440 48. Chotiprasitsakul D, Santanirand P, Thitichai P, Rotjanapan P, Watcharananan S, Siriarayapon  
441 P, et al. Epidemiology and control of the first reported vancomycin-resistant *Enterococcus* outbreak  
442 at a tertiary-care hospital in Bangkok, Thailand. *Southeast Asian J Trop Med Public Health*.  
443 2016;47(3):494-502.
- 444 49. Hemapanpairoa J, Changpradub D, Thunyaharn S, Santimaleeworagun W. Vancomycin-  
445 resistant enterococcal infection in a Thai university hospital: clinical characteristics, treatment  
446 outcomes, and synergistic effect. *Infect Drug Resist*. 2019;12:2049-57.
- 447
